# Supplementary material for: Steering supramolecular patterns by nucleobase-terminated molecules
Source: Royal Society of Chemistry journal article supplement (doi:10.1039/c2cc37522b), 2012-11-19
Supplement: c2cc37522b.pdf [file c2cc37522b.pdf]

## Supporting information

# Steering Supramolecular Pattern by Nucleobase-Terminated Molecules

Cai Shen, Jacob Roland Cramer, Mikkel F. Jacobsen, Lei Liu, Shuai Zhang, Mingdong Dong, Kurt Vesterager Gothelf, and Flemming Besenbacher

### **Molecular modeling**

Tentative molecular modeling was performed by using Materials Studio and the results were shown in figure S2 and figure S3. In all cases, molecules were packed by estimating that the distance between the two arms (alkyl side chain) is 4.5 Å, and the hydrogen bonding distance is 1.9 Å.

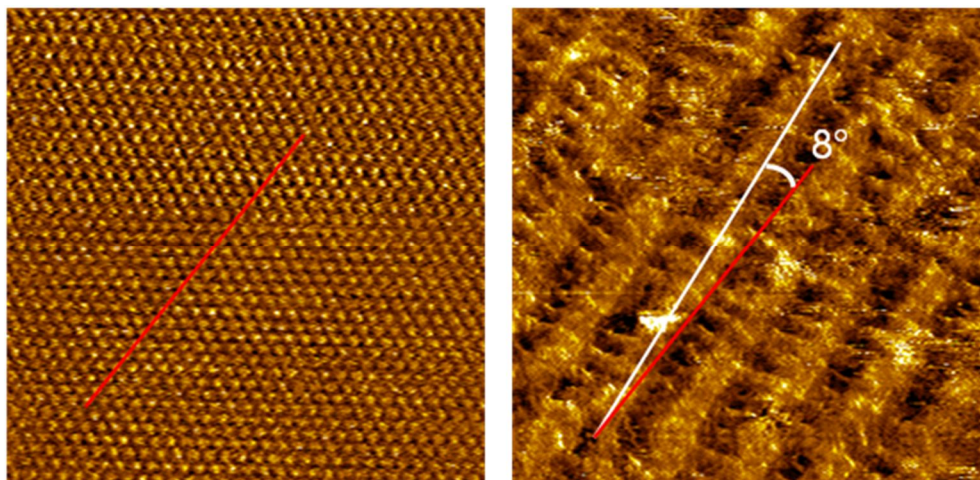

*Figure S1.* STM image of atomic resolved HOPG surface and A-A dimer on HOPG. The angle between the packing direction of the molecule (indicated by the white line) and the symmetric axis of graphite (indicated by the red line) is  $8^\circ$ .

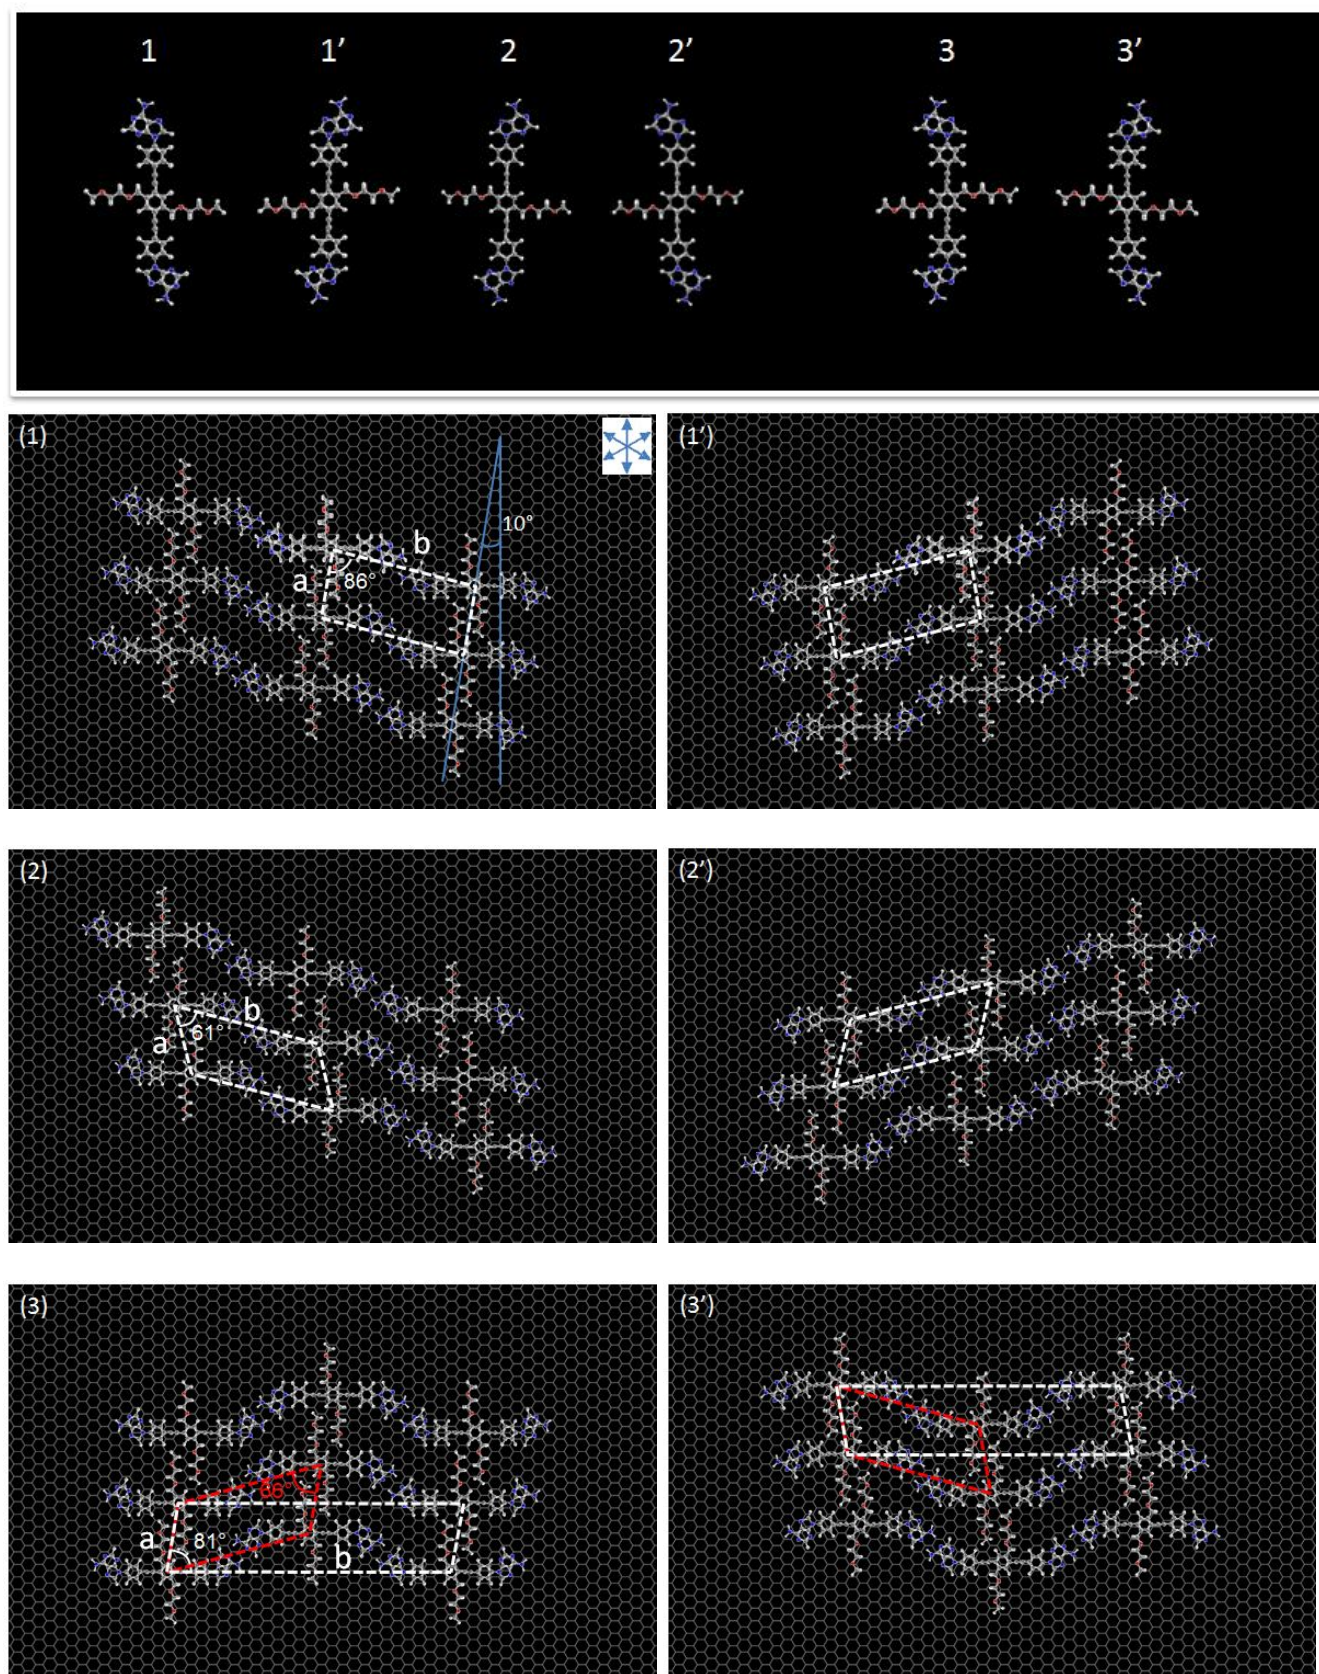

Figure S2. Tentative molecular models indicating possible arrangements of the six conformers of A-A dimer on HOPG (red: O, blue: N, white: H. Only the first layer of HOPG is shown). The unit cell indicated in **1** and **1'** is ( $13.8 \times 29.3 \text{ \AA}$ ) $R86^\circ$ .

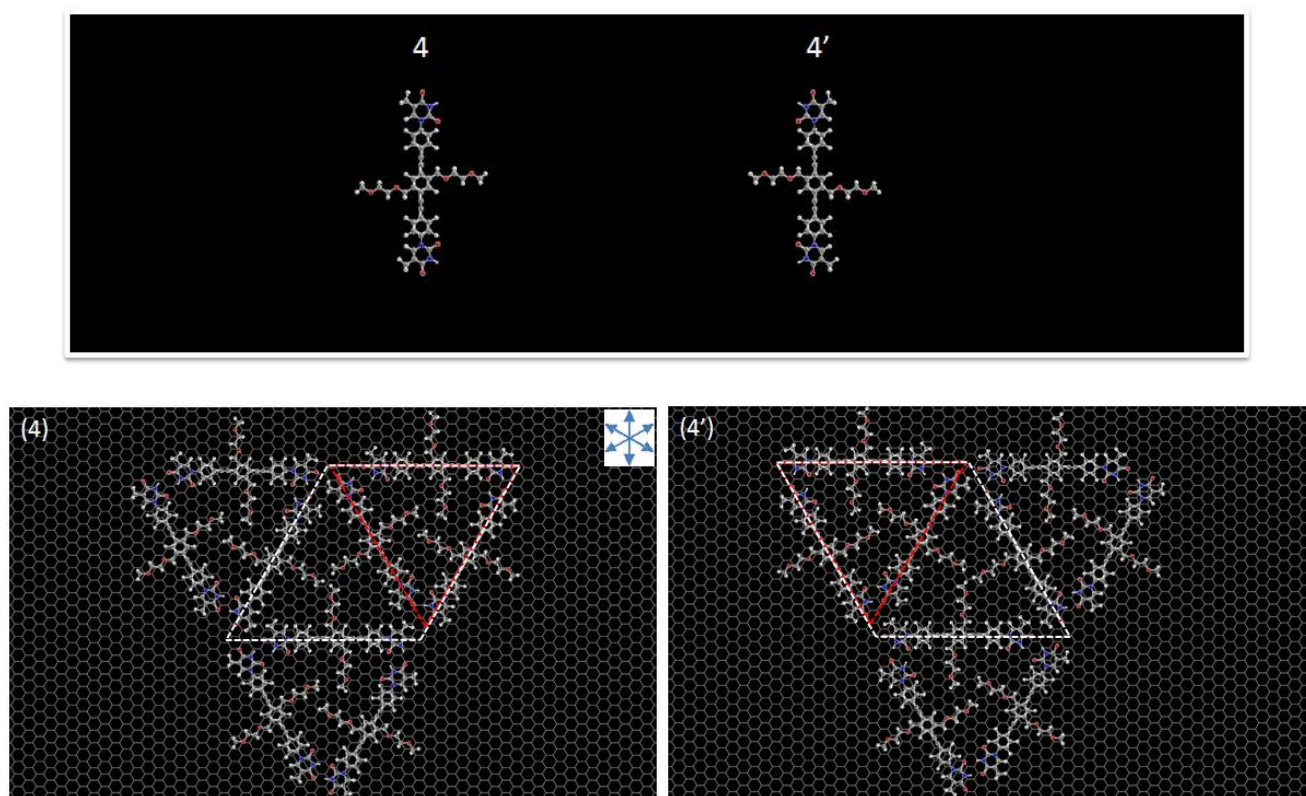

*Figure S3.* Tentative molecular models indicating possible arrangements of the two conformers of the T-T dimer on HOPG (red: O, blue: N, white: H. Only the first layer of HOPG is shown). The white unit indicates the unit cell. The red unit indicates that the unit cell has a structure of  $(35.4 \times 35.4 \text{ \AA})R60^\circ$ .
